# Supplementary material
Source: PubMed Central journal article supplement (PMC3506423)
Supplement: NIHMS412448-supplement-01.pdf [file NIHMS412448-supplement-01.pdf]

## Supplementary Table

**Table S1.** Poly I:C effect on epigenetic modifiers in human fibroblasts ( $p < 0.05$ , 2-fold changes)

---

**Downregulated genes**

---

*CDYL2, EHMT2, HDAC1, HDAC2, HDAC5, HDAC7, TRIM73*

---

**Upregulated genes**

---

*ATF6B, AURKC, CSRP2BP, CTBP1, DNMT3A, EED, EHMT2, MLL5, MYST3, MYST4, NCOA1, NSD1, PCGF5, PCGF3, RPS6KA3, RPS6KA5, SUZ12P, TRIM3, TRIM10, TRIM14, TRIM16L, TRIM25, TRIM58, TRIM62, TRIM64, USP16, WHSC1, ZMYND17*

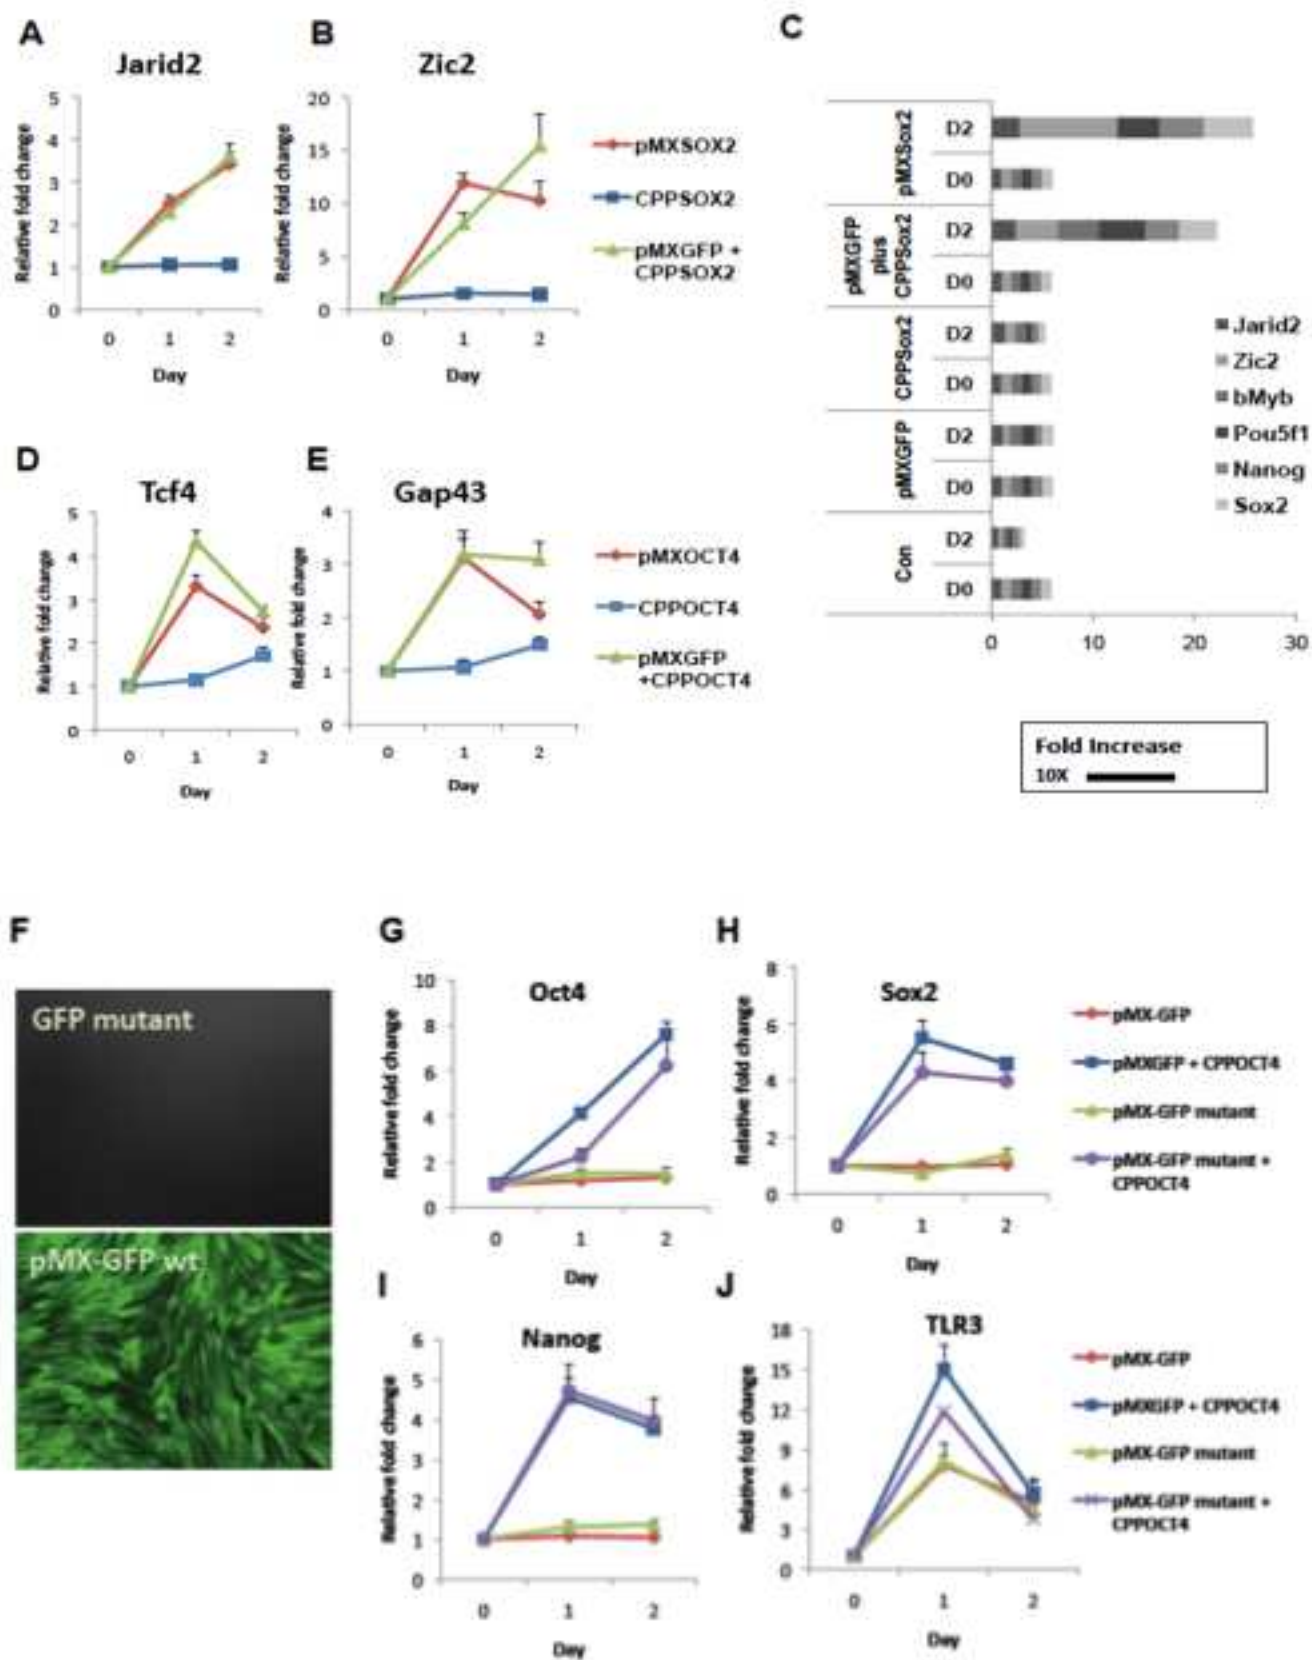

**Figure S1.** Irrelevant retroviral vector or non-integrating pMX-GFP accelerates CPP-induced gene expression, Related to Figure 1

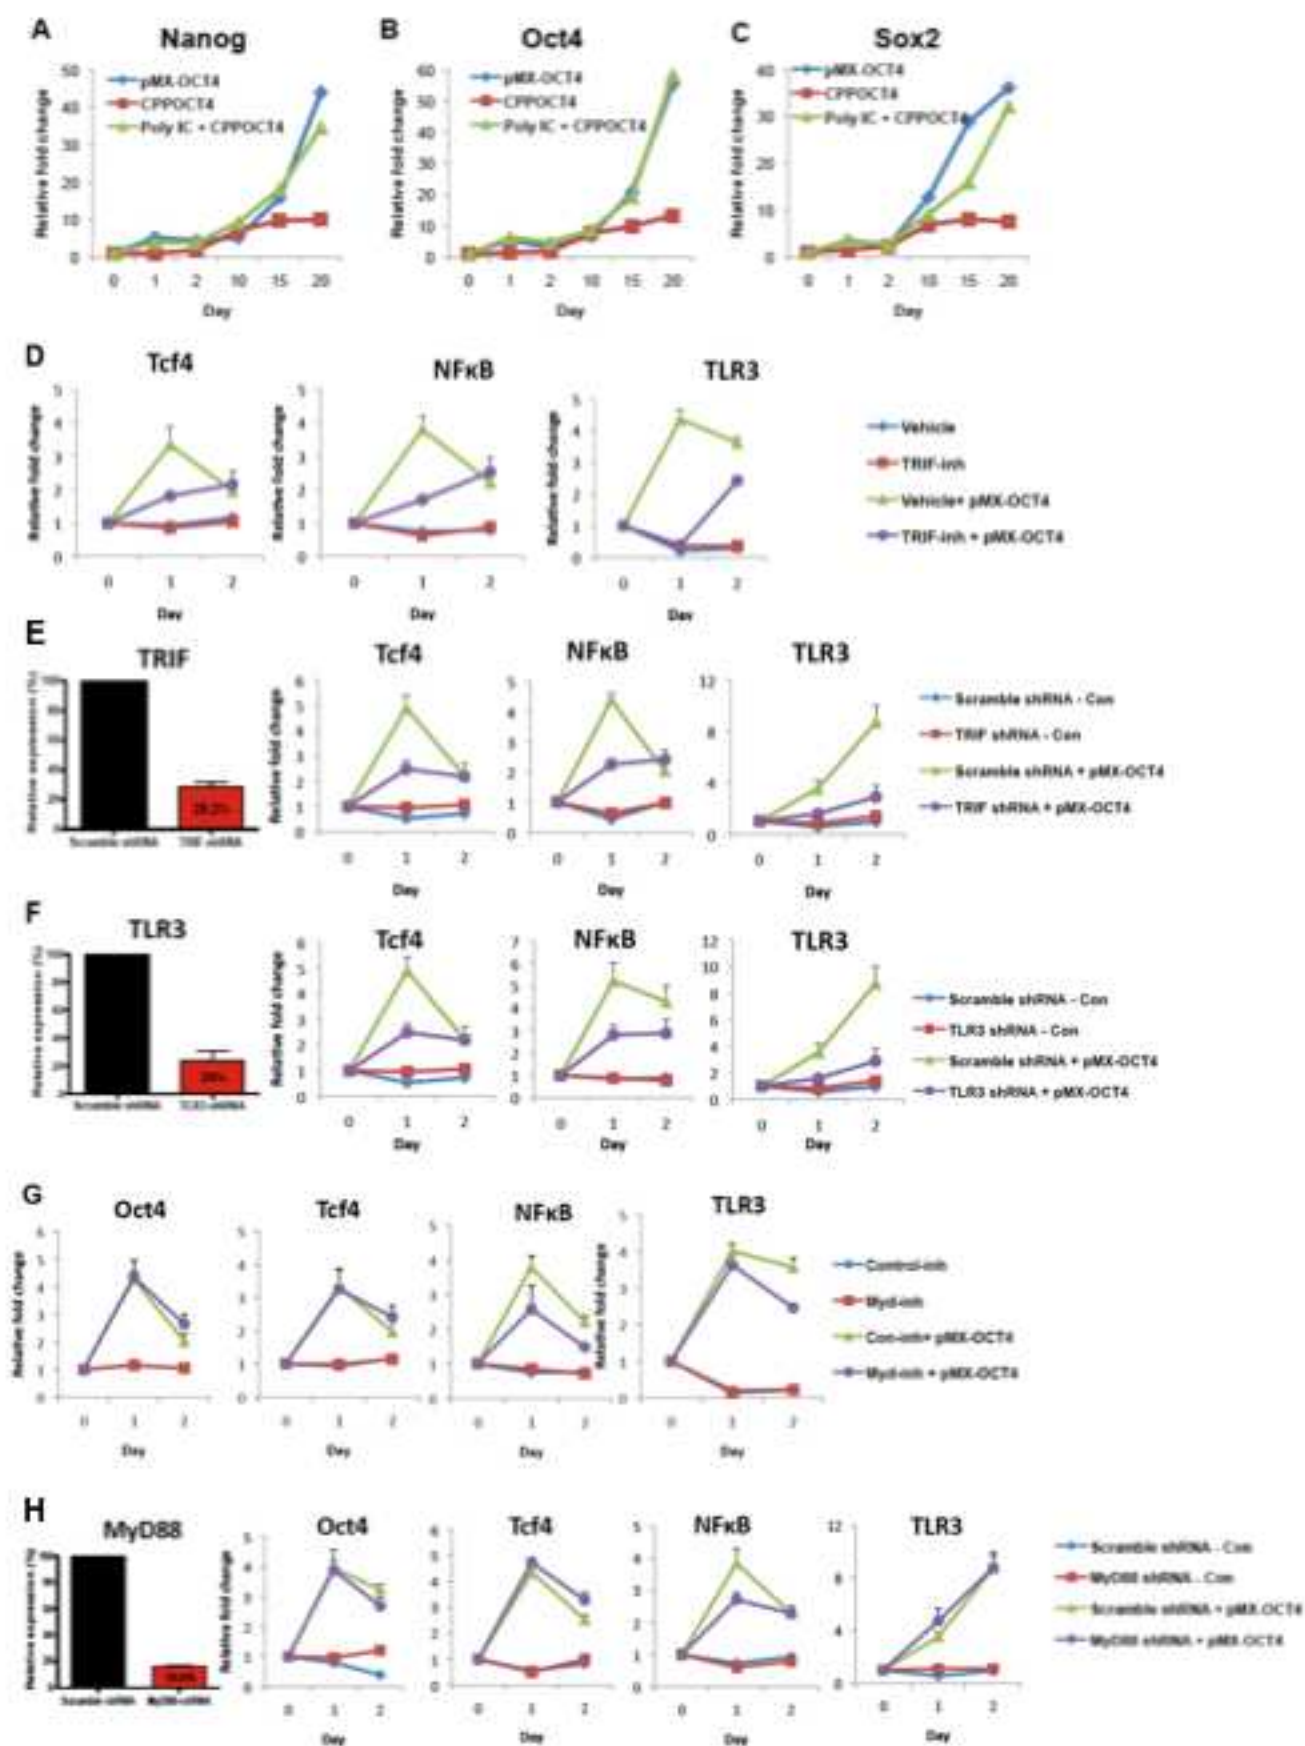

**Figure S2.** Gene expression induced by individual reprogramming factors expressed from viral vectors or delivered as cell-permeant peptides, Related to **Figure 1** and **Figure 2**

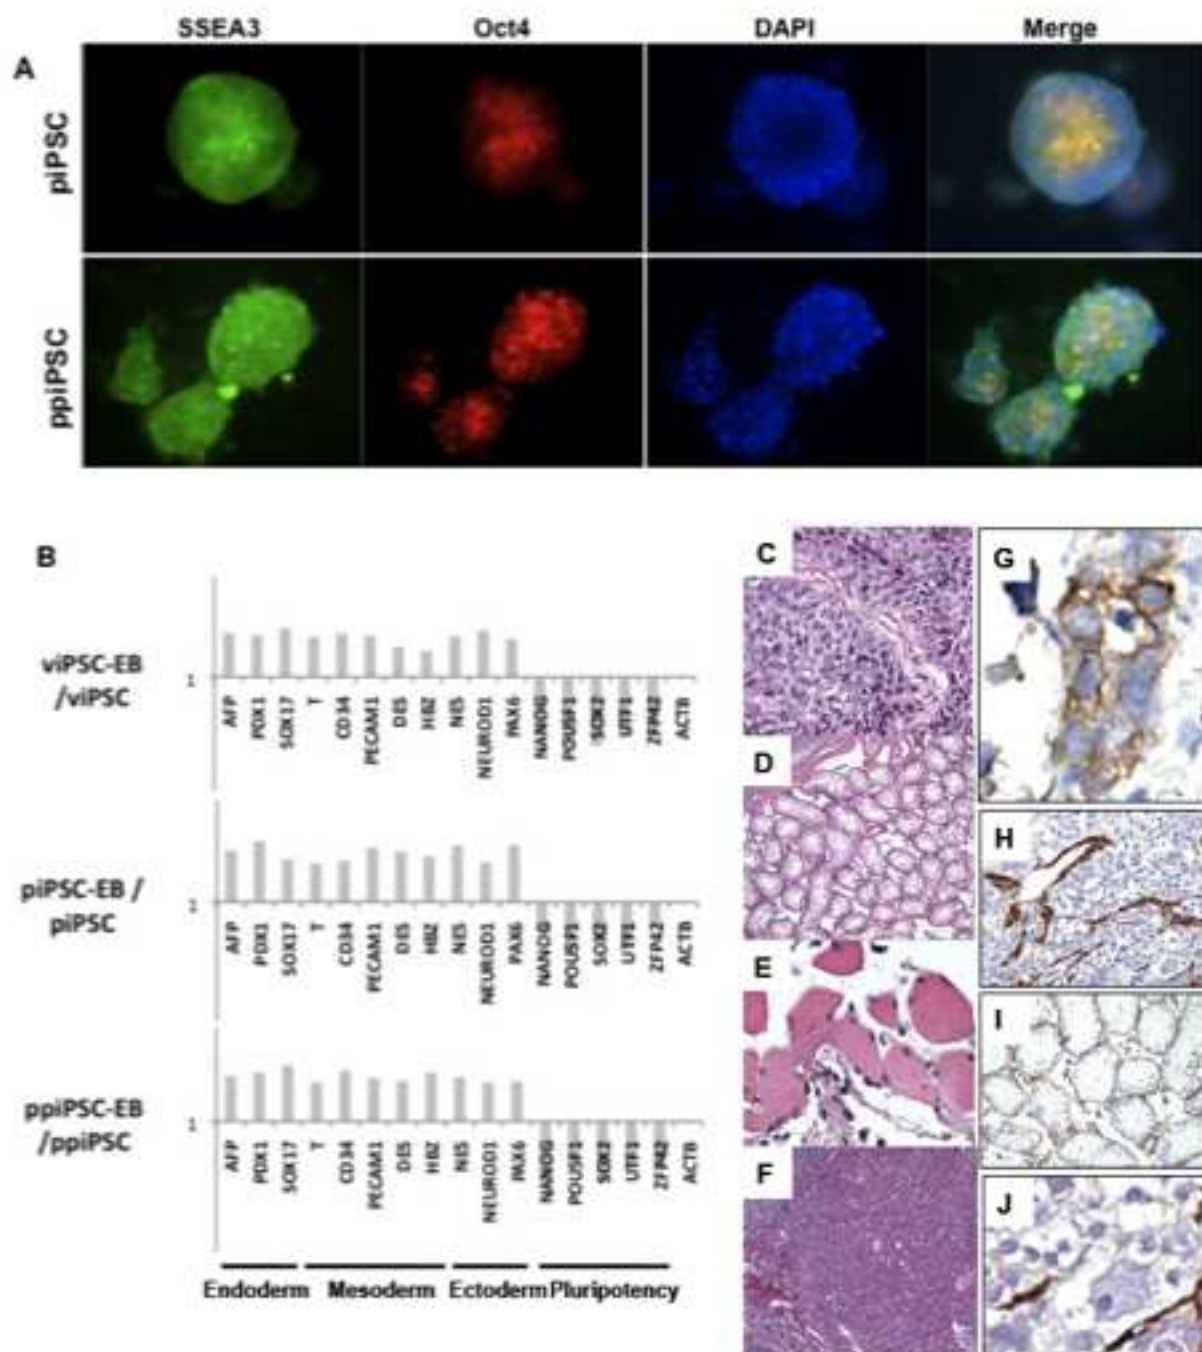

Figure S3. Characterization of Human piPSCs and ppiPSCs, Related to Figure 6

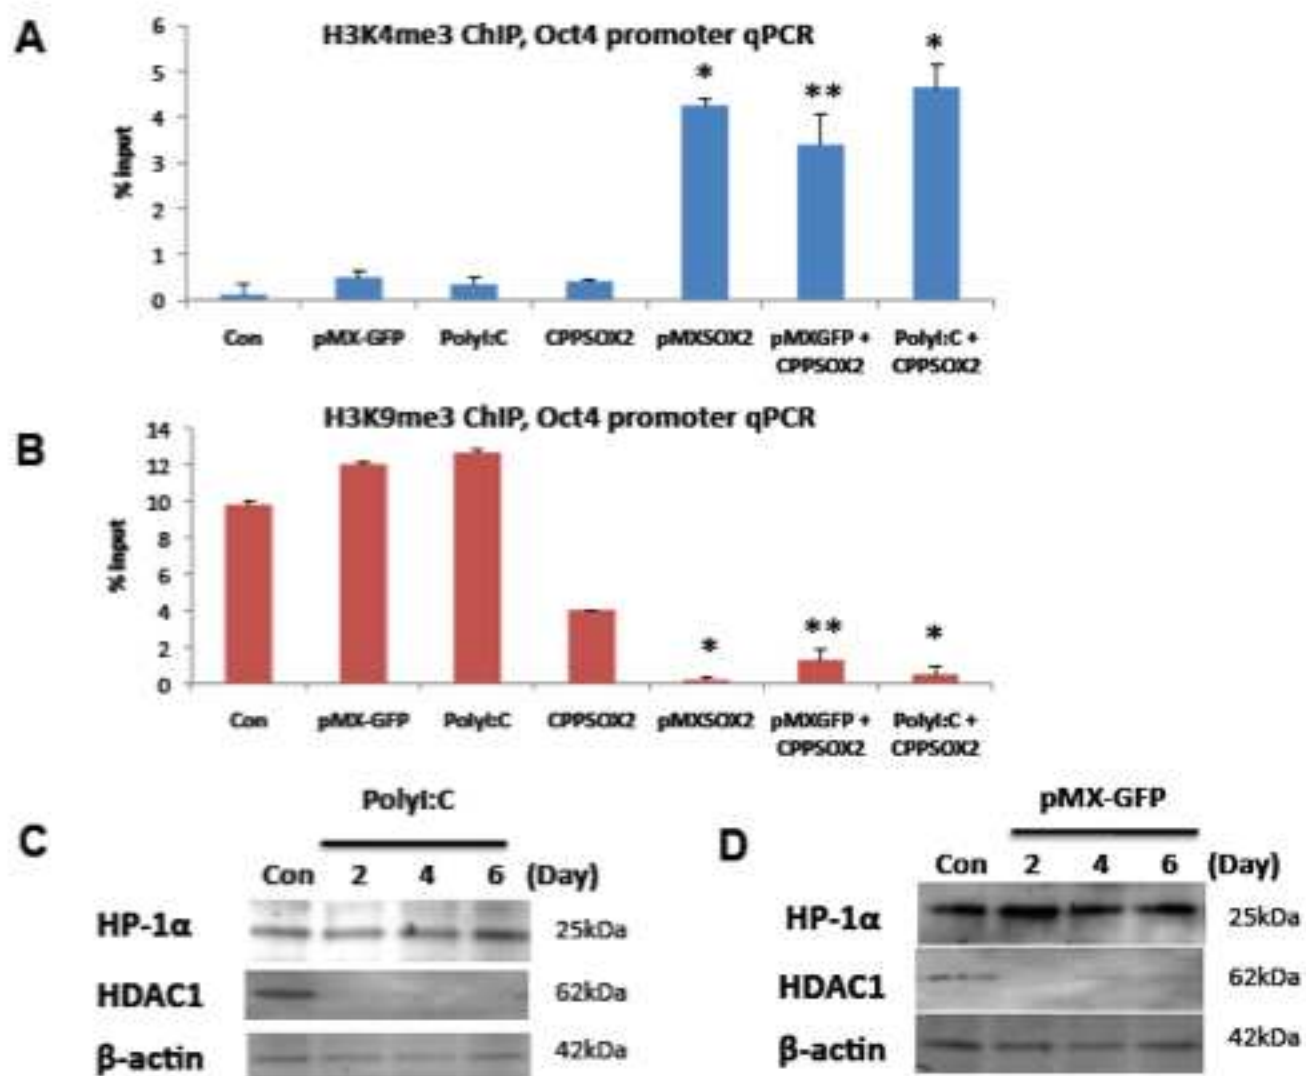

Figure S4. Poly I:C/Viral particles promote early epigenetic modification.



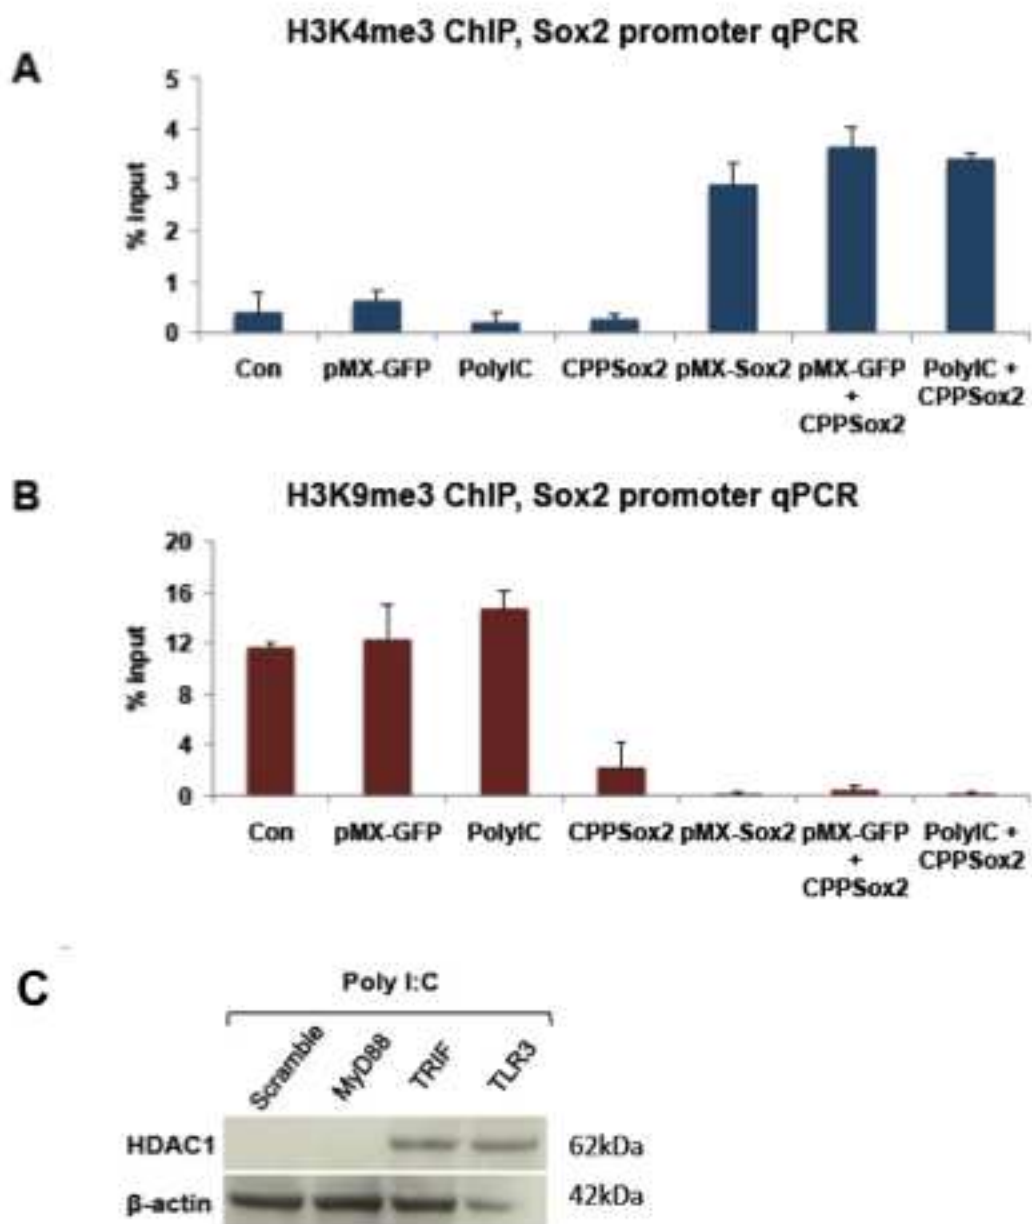

**Figure S5.** Poly I:C/Viral particles promote epigenetic modification.

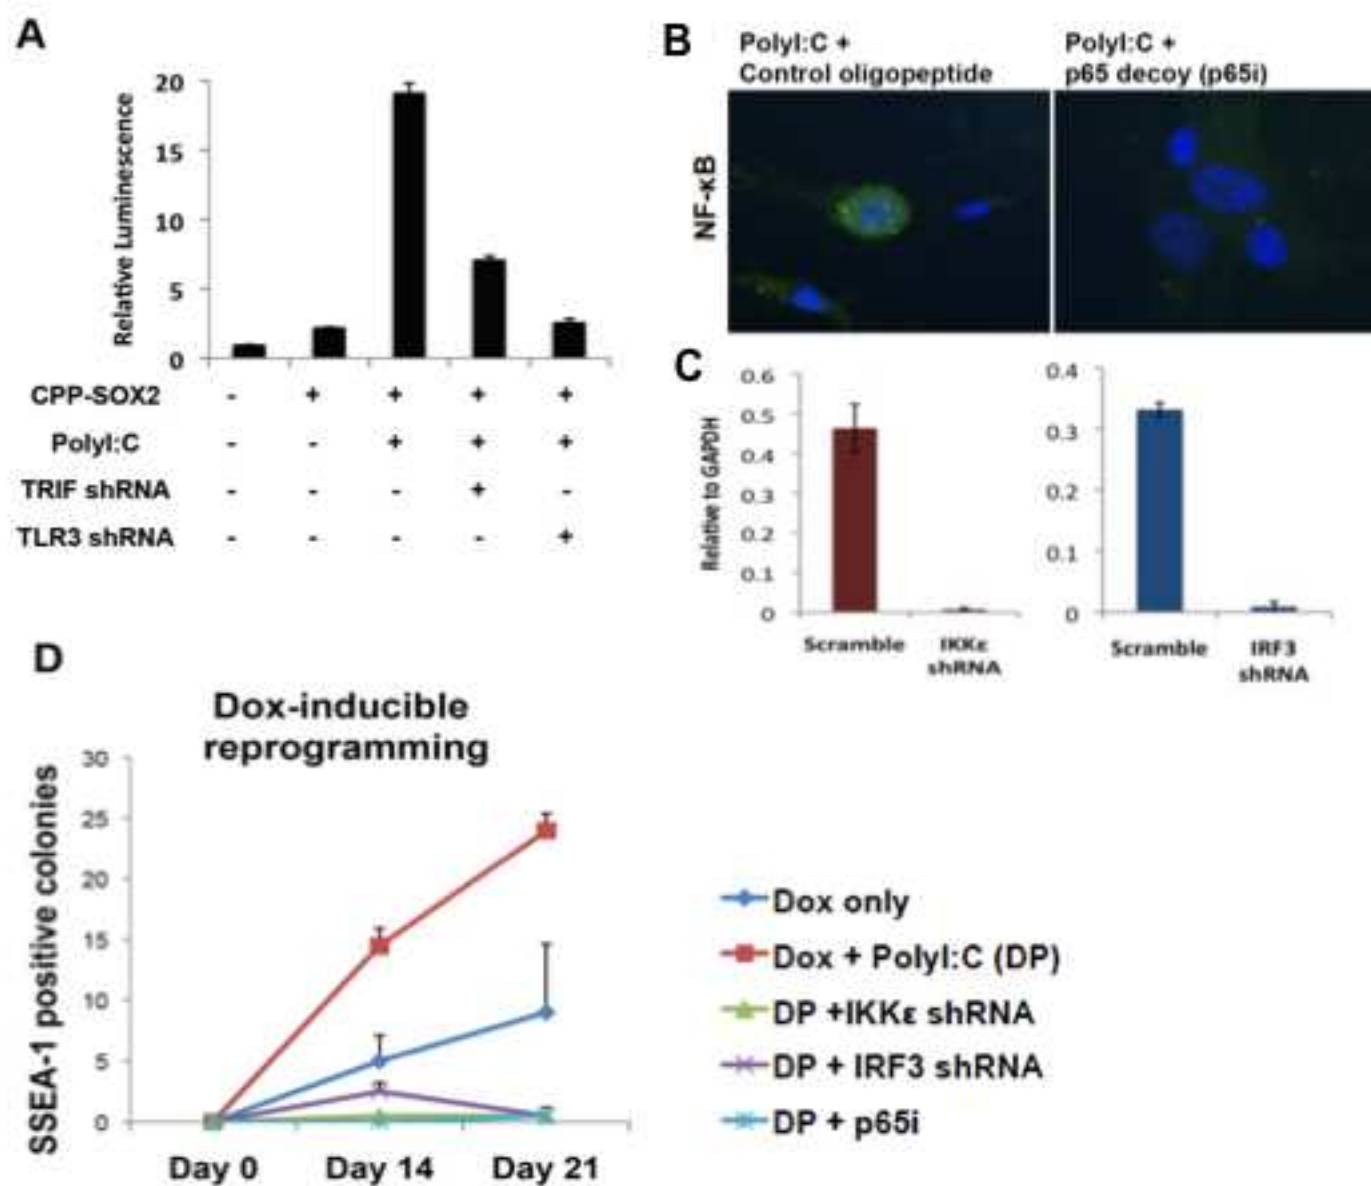

**Figure S6.** NF- $\kappa$ B, IKK $\epsilon$  or IRF3 inhibition impairs Doxycycline inducible reprogramming.

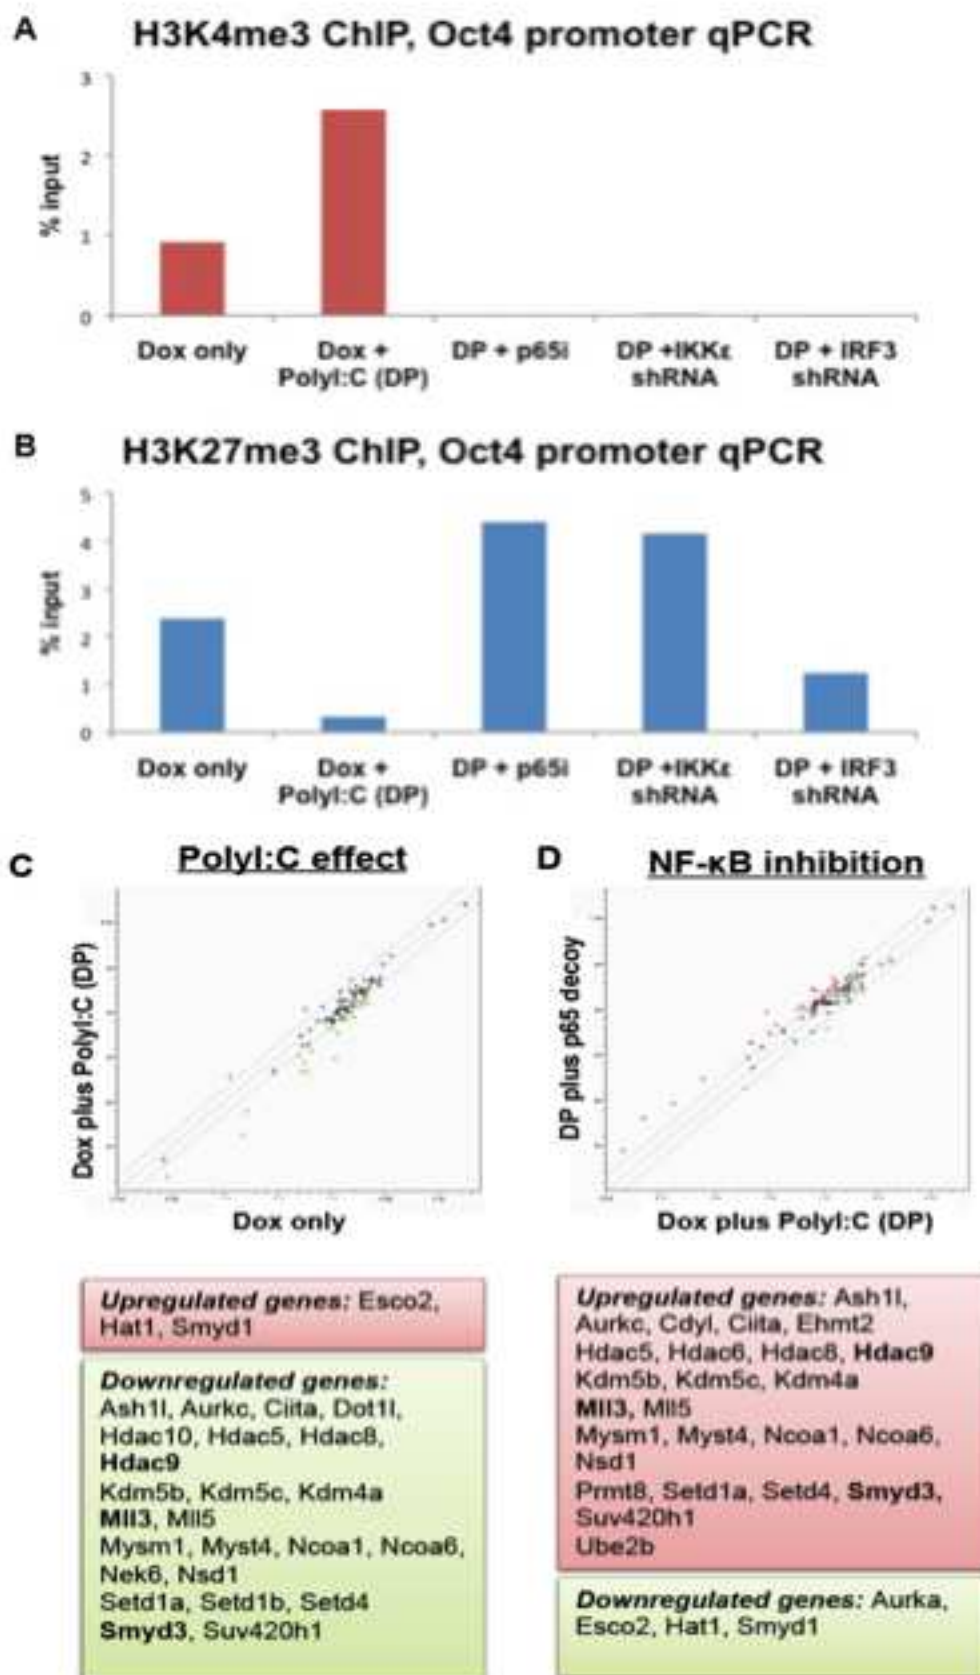

**Figure S7.** NF- $\kappa$ B, IKK $\epsilon$  or IRF3 inhibition blocks the poly I:C-induced epigenetic modification in Dox-MEF.
